# Supplementary material
Source: publisher figshare collection journal article supplement (https://acs.figshare.com/ndownloader/files/17859557)
Supplement: Supplementary file 1 [file 17859557]

# Supporting Information (SI)

## Reducing ammonia emissions from dairy cattle production via cost-effective manure management techniques in China

Nannan Zhang<sup>1,2,†</sup>, Zhaohai Bai<sup>1,†</sup>, Wilfried Winiwarter<sup>3,4</sup>, Stewart Ledgard<sup>5</sup>, Jiafa Luo<sup>5</sup>,  
Juan Liu<sup>1,2</sup>, Yongqing Guo<sup>1,6</sup>, Lin Ma<sup>1,\*</sup>

<sup>1</sup> Key Laboratory of Agricultural Water Resource, Hebei Key Laboratory of Soil Ecology, Center for Agricultural Resources Research, Institute of Genetic and Developmental Biology, Chinese Academy of Sciences, 286 Huaizhong Road, Shijiazhuang 050021, Hebei, China;

<sup>2</sup> University of Chinese Academy of Sciences, 19 A Yuquan Road, Shijingshan District, Beijing 100049, China

<sup>3</sup> International Institute for Applied Systems Analysis (IIASA), Schlossplatz 1, A-2361 Laxenburg, Austria

<sup>4</sup> The institute of Environmental Engineering, University of Zielona Gora, Licealna 9, 65-417 Zielona Gora, Poland

<sup>5</sup> AgResearch Limited, Ruakura Research Centre, Private Bag 3123, Hamilton 3240, New Zealand

<sup>6</sup> College of Animal Science, South China Agricultural University, Guangzhou 510642, China

† These authors contributed to this paper equally.

22 \* Corresponding author: email, malin1979@sjziam.ac.cn, phone +8618503216030

23 **Summary:** Supporting information contains 32 pages, 12 figures and 7 tables.

24

|    |                                                                                    |     |
|----|------------------------------------------------------------------------------------|-----|
| 25 | <b>Contents</b>                                                                    |     |
| 26 | 1. Measurement of ammonia emission abatement efficiency from diet manipulation ... | S4  |
| 27 | 2. Measurement of ammonia emission abatement efficiency from acidification in      |     |
| 28 | housing .....                                                                      | S5  |
| 29 | 3. Measurement of ammonia emission abatement efficiency from covering and          |     |
| 30 | compaction of manure during storage .....                                          | S6  |
| 31 | 4. Technical implementation of the abatement options.....                          | S7  |
| 32 | 5. Calculation of reduction efficiency .....                                       | S9  |
| 33 | 6. Uncertainty and sensitivity analysis .....                                      | S9  |
| 34 | References .....                                                                   | S32 |
| 35 |                                                                                    |     |
| 36 |                                                                                    |     |

37 In this study, reduction efficiencies of the NH<sub>3</sub> mitigation measures were evaluated  
38 using an incubation method, which was used to represent the upper limits of the optimal  
39 NH<sub>3</sub> mitigation potentials. The trials were conducted in the laboratory at a temperature  
40 of 15-20°C. All selected mitigation options are shown in Table S6 (note: sequence of  
41 tables as mentioned in the main text). Excreta from cows from the diet manipulation  
42 treatments was derived from combination of urine and faeces collected from cows fed  
43 with a standard diet (17% crude protein [CP]) or a low CP diet (15% CP), which are  
44 detailed in the following section. Slurry used for testing acidification in housing was  
45 collected directly from the floor of a dairy house, while slurry used for the storage test  
46 was collected from manure channels that were connected to dairy houses. Both solid  
47 and liquid manures used for the storage test were collected after manure was separated  
48 using a screw-press separator. Thus, three manure types (slurry, solid and liquid  
49 manure) were evaluated for the storage stage. Properties of manures used in this study  
50 are shown in Table S7.

51

## 52 **1. Measurement of ammonia emission abatement efficiency from diet manipulation**

53 There were two dietary treatments in the present study; a standard diet (17% CP) and a  
54 low CP diet (15% CP). Ingredients of standard diet contained oat hay, 10.65% DM;  
55 alfalfa hay, 11.91% DM; whole corn silage, 28.02% DM; concentrate feed, 19.04%  
56 DM; steam-flaked corn, 13.55% DM; ground corn, 7.12% DM; soybean meal, 0.46%  
57 DM; whole cottonseed, 3.22% DM; beet pulp, 5.51% DM; mono-dicalcium phosphate,

58 0.52% DM. Ingredients of low CP diet contained: Oat hay, 10.65% DM; alfalfa hay,  
59 11.91% DM; whole corn silage, 28.02% DM; concentrate feed, 19.04% DM;  
60 steam-flaked corn, 8.5% DM; ground corn, 7.12% DM; soybean meal, 3.22% DM; corn  
61 gluten meal, 2.3% DM; whole cottonseed, 3.22% DM; beet pulp, 5.51% DM;  
62 mono-dicalcium phosphate, 0.52% DM. Urine and faeces were collected separately  
63 under the tail of 4 lactating cows fed the dietary treatments, 2 cows for each respective  
64 diets. Samples were collected individually over four continuous days and stored in  
65 plastic containers at 4°C to limit potential N loss during storage. Separate urine and  
66 faeces samples from each dairy cow were bulked for the four collection days.  
67 Immediately before the start of the experiment, 100 ml of urine and 150 g of faeces<sup>1</sup>  
68 from the same dairy cow were mixed in a plastic chamber with a height of 9.3 cm and  
69 diameter of 9.2 cm. For each dairy cow, three replicates of NH<sub>3</sub> emission measurements  
70 were made over five days using a static chamber.<sup>2,3</sup>

71

72 Gas emission rates were measured every six hours during the first day, every eight  
73 hours during the second day, and every twelve hours during the last three days. For each  
74 measurement, the concentration of NH<sub>3</sub> inside the chambers was recorded 3 times at an  
75 interval of 2 min between two adjacent measurement occasions using a Multi-Gas  
76 Monitor INNOVA 1412i. The difference in NH<sub>3</sub> gas concentration during the last two  
77 adjacent measurements was used to calculate the gas emission flux.

78

79 **2. Measurement of ammonia emission abatement efficiency from acidification in**  
80 **housing**

81 For simulation of housing practice, we assumed that the dairy building has a slatted  
82 floor. Slurry was directly collected from dairy housing, and moved to a box simulating a  
83 pit in a layer of 5 cm thick. Length, width and height of the simulated slatted pit were  
84 25.5, 37 and 22 cm, respectively. After the addition of manure into the pit, sulfuric acid  
85 ( $\text{H}_2\text{SO}_4$ ), diluted 1: 100 with water, was sprayed evenly on to the manure surface to add  
86 a layer of about 3 mm. Amount of acid was small compared to the volume of manure,  
87 and it was expected that it had no influence on quality of slurry and bio-availability of N  
88 in the manure.

89  
90 The ventilated chamber method was used to quantify  $\text{NH}_3$  emission five times:<sup>1</sup> at the  
91 beginning, and at 6, 12, 18 and 24 h after application of the acid. Ventilation rate was  
92 0.2 head space exchanges  $\text{min}^{-1}$  which simulated the air ventilation in the dairy  
93 building.<sup>1</sup>  $\text{NH}_3$  in the gas removed from the chamber was absorbed in 2% boric acid,  
94 which was subsequently titrated by standard  $\text{H}_2\text{SO}_4$  solution.  $\text{NH}_3$  emission was  
95 calculated from the consumption of  $\text{H}_2\text{SO}_4$ .

96  
97 **3. Measurement of ammonia emission abatement efficiency from covering and**  
98 **compaction of manure during storage**

99 During storage, we applied vermiculite cover or acidified vermiculite cover layers, each

100 with a 6 cm thickness, to the surface of slurry or surface of liquid manure. Acidified  
101 vermiculite cover was created by mixing lactic acid and vermiculite at a volume ratio of  
102 1:5. The diameter and height of the containers used were 20 and 35 cm, respectively.  
103 The abatement measures used for solid manure were a plastic film cover and/or  
104 compaction. The type of container for solid manure storage was the same as for slurry  
105 and liquid manure. The original height of solid manure was 20 cm. Compaction of solid  
106 manure halved the volume of manure.

107

108 Storage of slurry, liquid manure and solid manure lasted for 15 days, and gas emission  
109 was measured at 1, 2, 3, 4, 7, 11 and 15 days after application of the treatments. During  
110 storage, NH<sub>3</sub> emission was measured using the ventilated chamber method<sup>4</sup>. Air  
111 ventilation rate was 20 head space exchanges min<sup>-1</sup>, which was used to measure the  
112 maximum potential NH<sub>3</sub> emission. NH<sub>3</sub> in the gas removed from the chamber was  
113 absorbed in 2% boric acid, titrated with standard H<sub>2</sub>SO<sub>4</sub> and calculated as for the  
114 acidification study described above.

115

#### 116 **4. Technical implementation of the abatement options**

117 For cow housing, we determined the effects of the acidification treatment for manure  
118 under a slatted floor (Figure 1a). To estimate the cost involving the acidification  
119 measures, we made the following general assumptions about dairy houses, acidification  
120 system and application: 1) each dairy building has two stirring systems, which were

121 used to dilute  $\text{H}_2\text{SO}_4$  100 times, and four sprinkler systems, which were used to apply  
122 the diluted  $\text{H}_2\text{SO}_4$  to the surface of slurry under the slatted floor; 2) each sprinkler  
123 system included 50 nozzles, 110 m pipe and one pump; and 3) three L of tap water  $\text{m}^{-2}$   
124 manure was used to clean the spraying system after each operation.

125

126 For the covered system, a cover was assumed to be applied across the stored slurry and  
127 liquid manure (Figures 1b and S11). The equipment used here was a mixer and a system  
128 consisting of a U-spiral conveyor with mesh on the bottom and tracks, installed on the  
129 edge of the tank. Movement of the conveyor along the tracks at a proper speed could  
130 distribute the vermiculite cover or the acidified vermiculite cover to the surface of  
131 manure in the store tank. For the acidified vermiculite cover treatment, a mixer was  
132 used for mixing lactic acid with vermiculite. As size of tank influenced the costs of the  
133 equipment and operation, we assumed that the tank used for storage was 10 m wide  
134 with a maximum depth of 4.5 m for stored slurry and liquid manure, based on the  
135 general practice on the dairy farm.

136

137 Plastic film cover was placed on the top edge of the store facility (Figure 1c). As  
138 manure was added to the facility, the plastic film was immediately used to cover it  
139 mainly through a manual operation, and the lifetime of the plastic film used was  
140 assumed to be 1 year. A road roller was used for compacting the solid manure (Figure  
141 1c). As for the assumption presented above, the depth of stored solid manure was 1.5 m



142 while the depth of solid manure added per day was 0.15 m. The road roller was used to  
143 compact the new added manure on the top of the manure store for three times in  
144 succession each time.

145

## 146 **5. Calculation of reduction efficiency**

147 Abatement efficiencies of the test options were calculated based on differences in total  
148 NH<sub>3</sub> emission from the tested options and the controls according to eq S1:

$$149 \text{ RE} = \frac{f_{\text{control}} - f_{\text{abatement}}}{f_{\text{control}}} \quad (\text{S1})$$

150 Where RE is defined as the reduction efficiency of abatement options directly measured  
151 from the experiment;  $f_{\text{control}}$  and  $f_{\text{abatement}}$  are total emissions for the nil-abatement and  
152 abatement measures, respectively.

153

## 154 **6. Uncertainty and sensitivity analysis**

155 Many factors influenced estimation of NH<sub>3</sub> emission, abatement potential and net  
156 economic benefit, such as animal numbers, emission factors, NH<sub>3</sub> abatement  
157 efficiencies and the price of materials used for technical implementation of the different  
158 options. Using the Monte Carlo simulation, uncertainties of baseline NH<sub>3</sub> emission,  
159 reduction potential and net economic benefit of the selected abatement options were  
160 assessed and are shown in Figures S2 and S6. Abatement options using the low CP diet,  
161 acidification of surface manure during housing and solid manure compaction  
162 (representing the most economic benefit, the highest-reduction and the lowest-reduction

163 abatement options, respectively) were selected to conduct the sensitivity analysis of the  
164 net economic benefit for the three components (i.e. total technical implementation cost,  
165 total mineral fertilizer cost saving and health damage cost saving) using both European  
166 health damage data set and decreased health damage data set (Figure S12). Based on the  
167 decreased health damage cost, the net economic benefit of low protein feed was more  
168 sensitive to total implementation cost and health damage cost saving than total mineral  
169 fertilizer cost saving, which was due to the low proportion of mineral fertilizer cost  
170 saving related to the net economic benefit. Based on the “European” health damage  
171 cost, the net economic benefit became more sensitive to the health damage cost saving.

172

173 **Table S1** Ammonia emission abatement efficiencies from the test abatement options

| Stage   | Manure system | Abatement option <sup>a</sup>                            | Reduction efficiency, % |         |
|---------|---------------|----------------------------------------------------------|-------------------------|---------|
|         |               |                                                          | Mean                    | Range   |
| Feeding | Mixed excreta | Low protein feed                                         | 24                      | 13-38   |
| Housing |               | Acidification                                            | 98                      | 97-98   |
| Storage | Slurry        | Cover                                                    | 81                      | 75-86   |
|         |               | Cover and acid                                           | 94                      | 93-94   |
|         | Liquid manure | Cover                                                    | 75                      | 74-77   |
|         |               | Cover and acid                                           | 86                      | 85-88   |
|         | Solid manure  | Plastic film cover                                       | 71                      | 66-75   |
|         |               | Manure compaction                                        | 2.7                     | 1.5-7.2 |
|         |               | Manure compaction & cover (liquid) <sup>b</sup>          | 37                      | 31-37   |
|         |               | Manure compaction & cover and acid (liquid) <sup>c</sup> | 42                      | 36-42   |

174 <sup>a</sup> See Table S6 for details of abatement options.

175 <sup>b</sup> Manure compaction & cover (liquid) refers to solid manure compaction and a  
 176 vermiculite cover on liquid produced following compaction during storage.

177 <sup>c</sup> Manure compaction & cover and acid (liquid) refers to solid manure compaction and a  
 178 vermiculite cover acidified with lactic acid on liquid produced following compaction  
 179 during storage.

180 **Table S2** List of parameters used for the calculation of investment cost

|                                     |               |                             | Total cost of investment <sup>a</sup> |                   | Fixed operation   | Lifetime of the | Numbers of dairy |
|-------------------------------------|---------------|-----------------------------|---------------------------------------|-------------------|-------------------|-----------------|------------------|
|                                     |               |                             | (US\$ system <sup>-1</sup> )          |                   | rate <sup>b</sup> | equipment       | cows             |
|                                     |               |                             | Mean                                  | s.d. <sup>c</sup> | (%)               | (year)          | (head)           |
| Acidification system during housing |               |                             | 595                                   | 46                | 4                 | 2               | 100 <sup>h</sup> |
| Distribution system                 | Slurry        | Cover <sup>d</sup>          | 7637                                  | 945               | 4                 | 10              | 500 <sup>i</sup> |
|                                     |               | Cover and acid <sup>e</sup> | 7637                                  | 945               | 4                 | 10              | 500 <sup>i</sup> |
|                                     | Liquid manure | Cover <sup>d</sup>          | 7383                                  | 934               | 4                 | 10              | 500 <sup>i</sup> |
|                                     |               | Cover and acid <sup>e</sup> | 7383                                  | 934               | 4                 | 10              | 500 <sup>i</sup> |
| Plastic film cover <sup>f</sup>     |               |                             | - <sup>j</sup>                        | -                 | 4                 | 1               | 500 <sup>i</sup> |
| Compaction system <sup>g</sup>      |               |                             | 1295                                  | 51                | 4                 | 6               | 500 <sup>i</sup> |

181 <sup>a</sup> Total cost of investment includes cost for equipment and installation excluding materials.

182 <sup>b</sup> Fixed operation rate reflects the cost of maintenance, insurance, and administrative overhead of equipment installed on dairy farm.

183 <sup>c</sup> s.d. means the standard deviation.

184 <sup>d</sup> Cover refers to a vermiculite cover on slurry or liquid manure during storage.

185 <sup>e</sup> Cover and acid refers to a vermiculite cover acidified with lactic acid on slurry or liquid manure during storage.

186 <sup>f</sup> Plastic film cover means the plastic film cover on the solid manure separated from slurry, and it can be operated without any equipment.

187 <sup>g</sup> Compaction system means the road roller for solid manure compaction.

188 <sup>h</sup> 100 means that the assumption of one system of corresponding mitigation option was based on 1 animal building housing 100 dairy cows.

189 <sup>i</sup> 500 means that the assumption of one system of corresponding mitigation option was based on 1 dairy farm with 500 dairy cows.

190 <sup>j</sup> No equipment was used for the implementation of plastic film cover on solid manure, and labor and plastic film cover were classified to  
 191 be the variable operation.

192 **Table S3** List of parameters used for the calculation of variable operation costs

|                                                   |               |                             | Labor cost                                 | Energy cost                                | Price of the material (US\$ m <sup>-3</sup> ) <sup>a</sup> |                    |
|---------------------------------------------------|---------------|-----------------------------|--------------------------------------------|--------------------------------------------|------------------------------------------------------------|--------------------|
|                                                   |               |                             | (US\$ cow <sup>-1</sup> yr <sup>-1</sup> ) | (US\$ cow <sup>-1</sup> yr <sup>-1</sup> ) | Mean                                                       | Standard deviation |
| Acidification system during housing               |               |                             | 0.09                                       | 0.02                                       | 459                                                        | 111                |
| Distribution system                               | Slurry        | Cover <sup>d</sup>          | 0.17                                       | 0.01                                       | 17                                                         | 2.5                |
|                                                   |               | Cover and acid <sup>e</sup> | 0.74                                       | 0.02                                       | 302                                                        | 41                 |
|                                                   | Liquid manure | Cover <sup>d</sup>          | 0.09                                       | 0.01                                       | 17                                                         | 2.5                |
|                                                   |               | Cover and acid <sup>e</sup> | 0.36                                       | 0.01                                       | 302                                                        | 41                 |
| Plastic film cover <sup>f</sup>                   |               |                             | 0.00                                       | 0.00                                       | 0.4                                                        | 0.08               |
| Compaction <sup>g</sup>                           |               |                             | 0.55                                       | 0.60                                       | -                                                          | -                  |
| Compaction & cover (liquid) <sup>h</sup>          |               |                             | 0.58                                       | 0.60                                       | 17                                                         | 2.5                |
| Compaction & cover and acid (liquid) <sup>i</sup> |               |                             | 0.65                                       | 0.60                                       | 302                                                        | 41                 |

193 Table continued and footnotes on next page.

194 **Table S3** List of parameters used for the calculation of variable operation costs (continued)

|                                                   | Usage amount<br>of material | Unit of usage amount                                      | Working area of storage facility <sup>b</sup><br>(m <sup>2</sup> cow <sup>-1</sup> yr <sup>-1</sup> ) |                    | R <sub>f</sub> <sup>c</sup><br>(times yr <sup>-1</sup> ) |
|---------------------------------------------------|-----------------------------|-----------------------------------------------------------|-------------------------------------------------------------------------------------------------------|--------------------|----------------------------------------------------------|
|                                                   |                             |                                                           | Mean                                                                                                  | Standard deviation |                                                          |
| Acidification system during housing               | 0.58                        | ml H <sub>2</sub> SO <sub>4</sub> kg <sup>-1</sup> manure |                                                                                                       | -                  | 365                                                      |
| Distribution Slurry<br>system                     | Cover <sup>d</sup>          | cm thickness                                              | 0.66                                                                                                  | 0.19               | 6                                                        |
|                                                   |                             |                                                           | 0.66                                                                                                  | 0.19               | 6                                                        |
|                                                   | Cover and acid <sup>e</sup> | cm thickness                                              | 0.32                                                                                                  | 0.09               | 6                                                        |
|                                                   |                             |                                                           | 0.32                                                                                                  | 0.09               | 6                                                        |
| Liquid manure                                     | Cover <sup>d</sup>          | cm thickness                                              | 0.32                                                                                                  | 0.09               | 6                                                        |
| Plastic film cover <sup>f</sup>                   | 0.77                        | m <sup>2</sup> cow <sup>-1</sup> yr <sup>-1</sup>         | 0.78                                                                                                  | 0.09               | 1                                                        |
| Compaction <sup>g</sup>                           | -                           | -                                                         |                                                                                                       | 91.9               | 365                                                      |
| Compaction & cover (liquid) <sup>h</sup>          | 6                           | cm                                                        | 0.09                                                                                                  | 0.02               | 6                                                        |
| Compaction & cover and acid (liquid) <sup>i</sup> | 6                           | cm                                                        | 0.09                                                                                                  | 0.02               | 6                                                        |

195 <sup>a</sup> Unit price of plastic film cover is US\$ m<sup>-2</sup>.

196 <sup>b</sup> Working area of storage facility for slurry and liquid manure means area of storage place, and working area of storage facility for  
197 compaction system means the total area for compaction per year based on assumption of 0.15 m thickness of solid manure added per day,  
198 and its uncertainty was derived from the variation of the depth of storage facility.

199 <sup>c</sup> R<sub>f</sub> refers to the replacement frequency.

200 <sup>d</sup> Cover refers to a vermiculite cover on slurry or liquid manure during storage.

201 <sup>e</sup> Cover and acid refers to a vermiculite cover acidified with lactic acid on slurry or liquid manure during storage.

202 <sup>f</sup> Plastic film cover refers to a plastic film cover on solid manure during storage. Considering the limited labor time to apply the plastic film  
203 cover, no additional staff and salary was assumed.

204 <sup>g</sup> Compaction refers to solid manure compaction. No material is applied to compaction system.

205 <sup>h</sup> Materials applied to compaction & cover (liquid) refers to a vermiculite cover on liquid produced following compaction.

206 <sup>i</sup> Materials applied to compaction & cover and acid (liquid) refers to a vermiculite cover acidified with lactic acid on liquid waste produced  
207 following compaction.

208 **Table S4** Uncertainty range and probability density function (PDF) of input parameters in the ammonia emission estimation, emission  
 209 reduction estimation and cost-benefit analysis.

| Item                                                                                                   | Uncertainty range <sup>a</sup> | PDF       | Reference           |
|--------------------------------------------------------------------------------------------------------|--------------------------------|-----------|---------------------|
| Emission estimation:                                                                                   |                                |           |                     |
| Livestock number                                                                                       | ±5%                            | Normal    | 5, 6                |
| Manure N excretion                                                                                     | ±20%                           | Lognormal | 7, 8                |
| N emission factor (NH <sub>3</sub> , N <sub>2</sub> O, N <sub>2</sub> , NO <sub>3</sub> <sup>-</sup> ) | ±33%                           | Lognormal | 7, 9,10             |
| Reduction efficiency                                                                                   | See Table S1                   | Normal    | This study          |
| Cost-benefit analysis:                                                                                 |                                |           |                     |
| Investment price                                                                                       | See Table S2                   | Normal    | Survey <sup>b</sup> |
| Variable operation cost                                                                                | See Table S3                   | Normal    | Survey <sup>b</sup> |
| Urea price                                                                                             | ±5%                            | Normal    | Survey <sup>b</sup> |
| Diesel fuel price                                                                                      | ±20%                           | Normal    | Survey <sup>b</sup> |
| Gasoline fuel price                                                                                    | ±20%                           | Normal    | Survey <sup>b</sup> |
| Diet ingredient price                                                                                  | ±5%                            | Normal    | Survey <sup>b</sup> |
| Depth of manure storage facility (solid manure separated from slurry)                                  | ±33%                           | Normal    | Survey <sup>b</sup> |
| Depth of manure storage facility (slurry and liquid manure separated from slurry)                      | ±11%                           | Normal    | Survey <sup>b</sup> |
| Animal stock in dairy farm                                                                             | ±70%                           | Normal    | Survey <sup>b</sup> |
| Population                                                                                             | ±5%                            | Normal    | 6                   |
| Land area                                                                                              | ±5%                            | Normal    | 6                   |
| Fertilizer replacement percentage of retained manure N                                                 | ±33%                           | Uniform   | Survey <sup>b</sup> |

210 <sup>a</sup> When the direct standard deviation is not available, the uncertainty range was assumed to be ±2 standard deviations of the parameter.

211 <sup>b</sup> Survey means that the uncertainty range of the parameters was derived survey data.

212 **Table S5** Health damage cost saving and net economic benefit considering health damage cost saving under selected abatement options for  
 213 dairy production in China in 2015. The respective scenarios are described in Section 2.2 in the main text.

|                                                                                   | Acidification | Low protein feed | Cover and acid (slurry) | Cover (slurry) | Cover and acid (liquid) | Cover (liquid) |
|-----------------------------------------------------------------------------------|---------------|------------------|-------------------------|----------------|-------------------------|----------------|
| Health damage cost saving (European health data set <sup>a)</sup> , million US\$  | 4474          | 2816             | 2036                    | 2019           | 1355                    | 1185           |
| Net economic benefit (European health data set <sup>b)</sup> , million US\$       | 4315          | 4383             | 522                     | 1906           | 596                     | 1108           |
| Health damage cost saving (Decreased health data set <sup>a)</sup> , million US\$ | 447           | 282              | 204                     | 202            | 136                     | 119            |
| Net economic benefit (Decreased health data set <sup>b)</sup> , million US\$      | 288           | 1848             | -1310                   | 89             | -624                    | 41             |

214 Table continued and footnotes on next page.



215 **Table S5** Health damage cost saving and net economic benefit considering health damage cost saving under selected abatement options for  
 216 dairy production in China in 2015. The respective scenarios are described in Section 2.2 in the main text.

|                                                                                      | Manure compaction &<br>cover and acid (liquid) | Plastic film<br>cover | Manure compaction &<br>cover (liquid) | Manure<br>compaction |
|--------------------------------------------------------------------------------------|------------------------------------------------|-----------------------|---------------------------------------|----------------------|
| Health damage cost saving (European health<br>data set <sup>a</sup> ), million US\$  | 1736                                           | 652                   | 1521                                  | 25                   |
| Net economic benefit (European health data set<br><sup>b</sup> ), million US\$       | 752                                            | 654                   | 1400                                  | -11                  |
| Health damage cost saving (Decreased health<br>data set <sup>a</sup> ), million US\$ | 174                                            | 65                    | 152                                   | 2.5                  |
| Net economic benefit (Decreased health data<br>set <sup>b</sup> ), million US\$      | -811                                           | 67                    | 31                                    | -33                  |

217 <sup>a</sup> European health data set means the health damage cost analysis based on the value of a life year in Europe.<sup>5, 6, 11</sup>

218 <sup>b</sup> Decreased health data set means the health damage cost analysis based on an adjustment factor for the value of a life year of 10%, which  
 219 was used as Chinese situation.<sup>5, 6, 12</sup>

220 **Table S6** Ammonia emission abatement options

| Stage                     | Manure system              | Abatement option                                   |                                                                                                                               |
|---------------------------|----------------------------|----------------------------------------------------|-------------------------------------------------------------------------------------------------------------------------------|
| Feeding                   | Mixed excreta              | Low protein feed                                   | 15% <sup>a</sup> compared with 17% <sup>b</sup> diet crude protein                                                            |
| Housing                   | Slurry                     | Acidification                                      | Spraying sulfuric acid (H <sub>2</sub> SO <sub>4</sub> , diluted 1: 100 with water) to form a layer of 3 mm on manure surface |
| Storage                   | Slurry                     | Cover                                              | Vermiculite cover with a layer of 6 cm on slurry                                                                              |
|                           |                            | Cover and acid                                     | Vermiculite mixed with lactic acid (99%) at a volume ratio of 1:5 with a layer of 6 cm on slurry                              |
|                           | Liquid manure <sup>c</sup> | Cover                                              | Vermiculite cover with a layer of 6 cm on slurry                                                                              |
|                           |                            | Cover and acid                                     | Vermiculite mixed with lactic acid (99%) at a volume ratio of 1:5 with a layer of 6 cm on slurry                              |
| Solid manure <sup>c</sup> | Plastic film cover         | -                                                  |                                                                                                                               |
|                           | Manure compaction          | Compaction until the volume of solid manure halved |                                                                                                                               |

221 <sup>a</sup> Ingredients of diet with 15% crude protein.

222 <sup>b</sup> Ingredients of diet with 17% crude protein.

223 <sup>c</sup> Liquid manure and solid manure were separated from slurry with a screw-press separator.

224 **Table S7** Chemical characteristic of manure used in the trials

| Parameters <sup>a</sup>             | Urine               |                     | Faeces     |            | Slurry from | Slurry from | Liquid     | Solid      |
|-------------------------------------|---------------------|---------------------|------------|------------|-------------|-------------|------------|------------|
|                                     | 17% CP <sup>b</sup> | 15% CP <sup>c</sup> | 17% CP     | 15% CP     | floor       | channel     | manure     | manure     |
| TN,<br>g N kg <sup>-1</sup> manure  | 11.42±0.02          | 8.73±2.33           | 3.96±0.15  | 3.89±0.26  | 3.42±0.23   | 4.36±0.18   | 2.15±0.20  | 2.96±0.09  |
| TAN,<br>g N kg <sup>-1</sup> manure | NA                  | NA                  | NA         | NA         | 1.24±0.07   | 2.08±0.05   | 1.33±0.17  | 0.45±0.16  |
| W, %                                | NA                  | NA                  | 84.02±0.37 | 82.08±0.53 | 86.30±0.99  | 74.42±1.79  | 93.84±3.19 | 57.53±0.59 |
| pH                                  | NA                  | NA                  | NA         | NA         | 8.26±0.09   | 8.18±0.21   | 8.09±0.19  | 8.61±0.08  |

225 <sup>a</sup> TN, total N; TAN, total ammoniacal N; W, water content.

226 <sup>b</sup> 17% CP means a standard diet treatment in the diet manipulation trial.

227 <sup>c</sup> 15% CP means a low crude protein diet treatment in the diet manipulation trial.

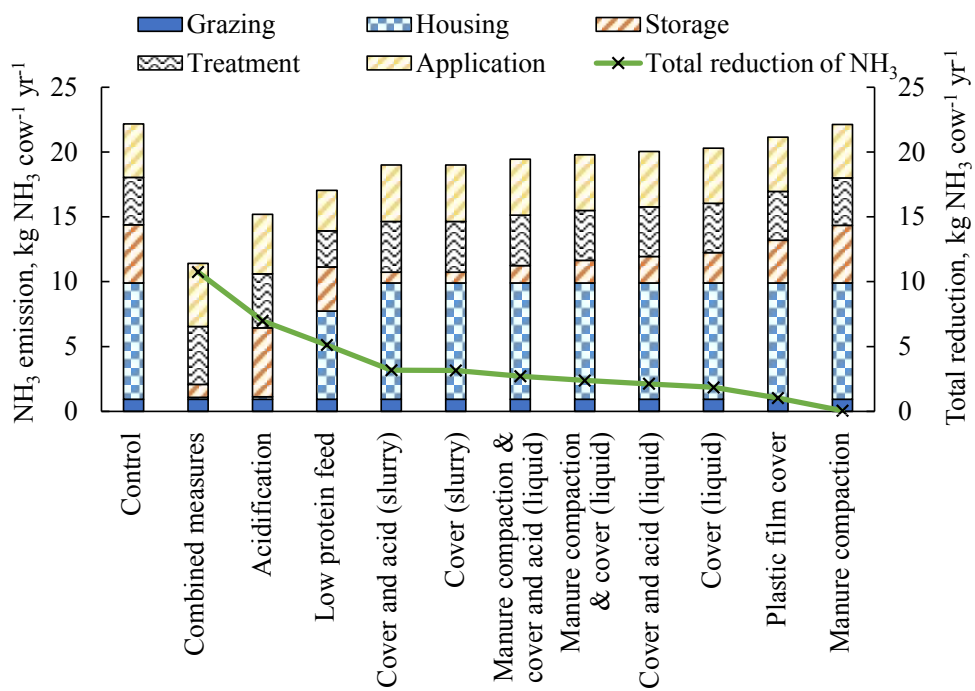

228

229 **Figure S1.** Ammonia emission on animal basis from selected abatement options for dairy  
 230 production in China in 2015. The respective scenarios are described in Section 2.2.

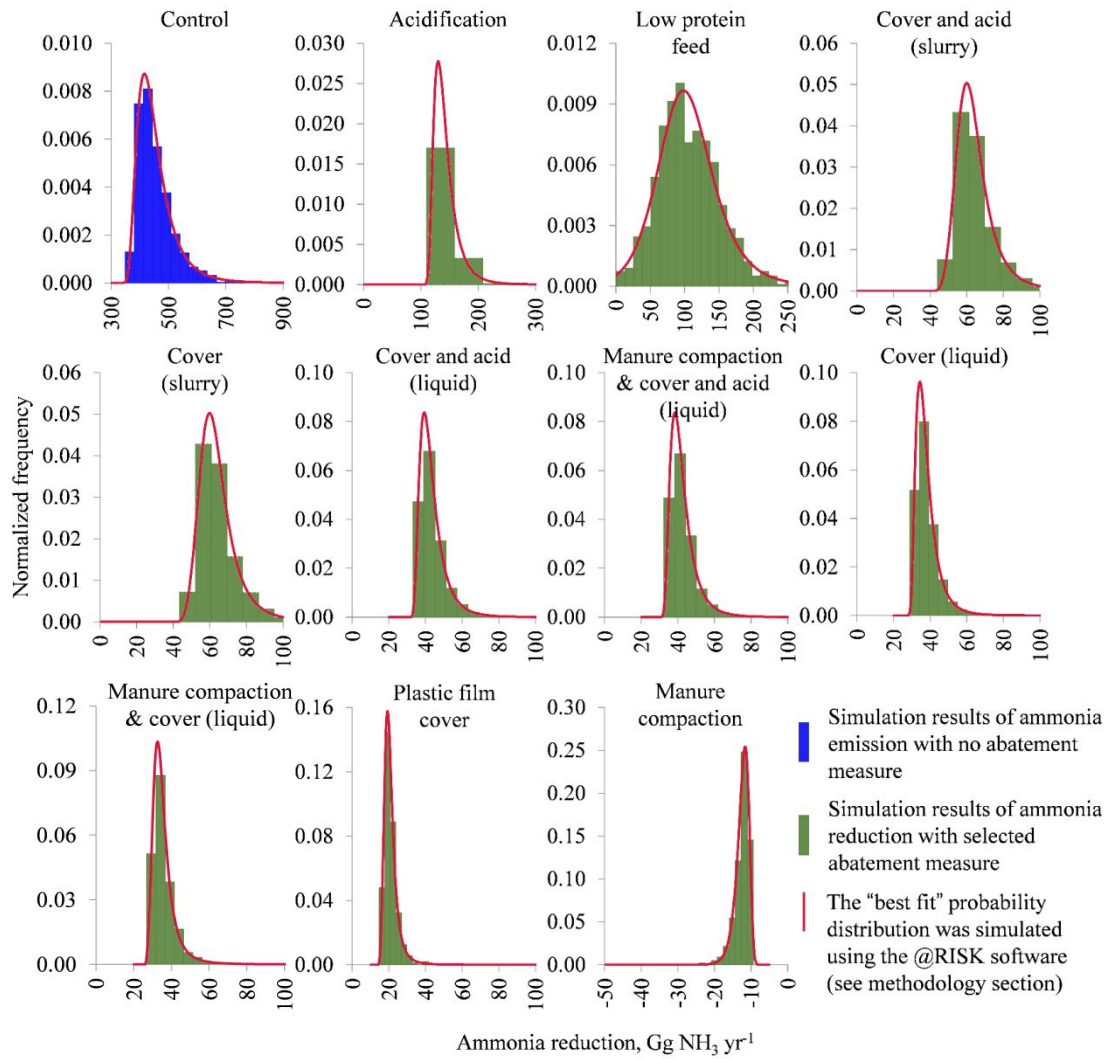

231

232

233

234

**Figure S2.** Uncertainty analysis of baseline ammonia emission for dairy production in China in 2015 and ammonia reduction under selected abatement options. The respective scenarios are described in Section 2.2 in the main text.

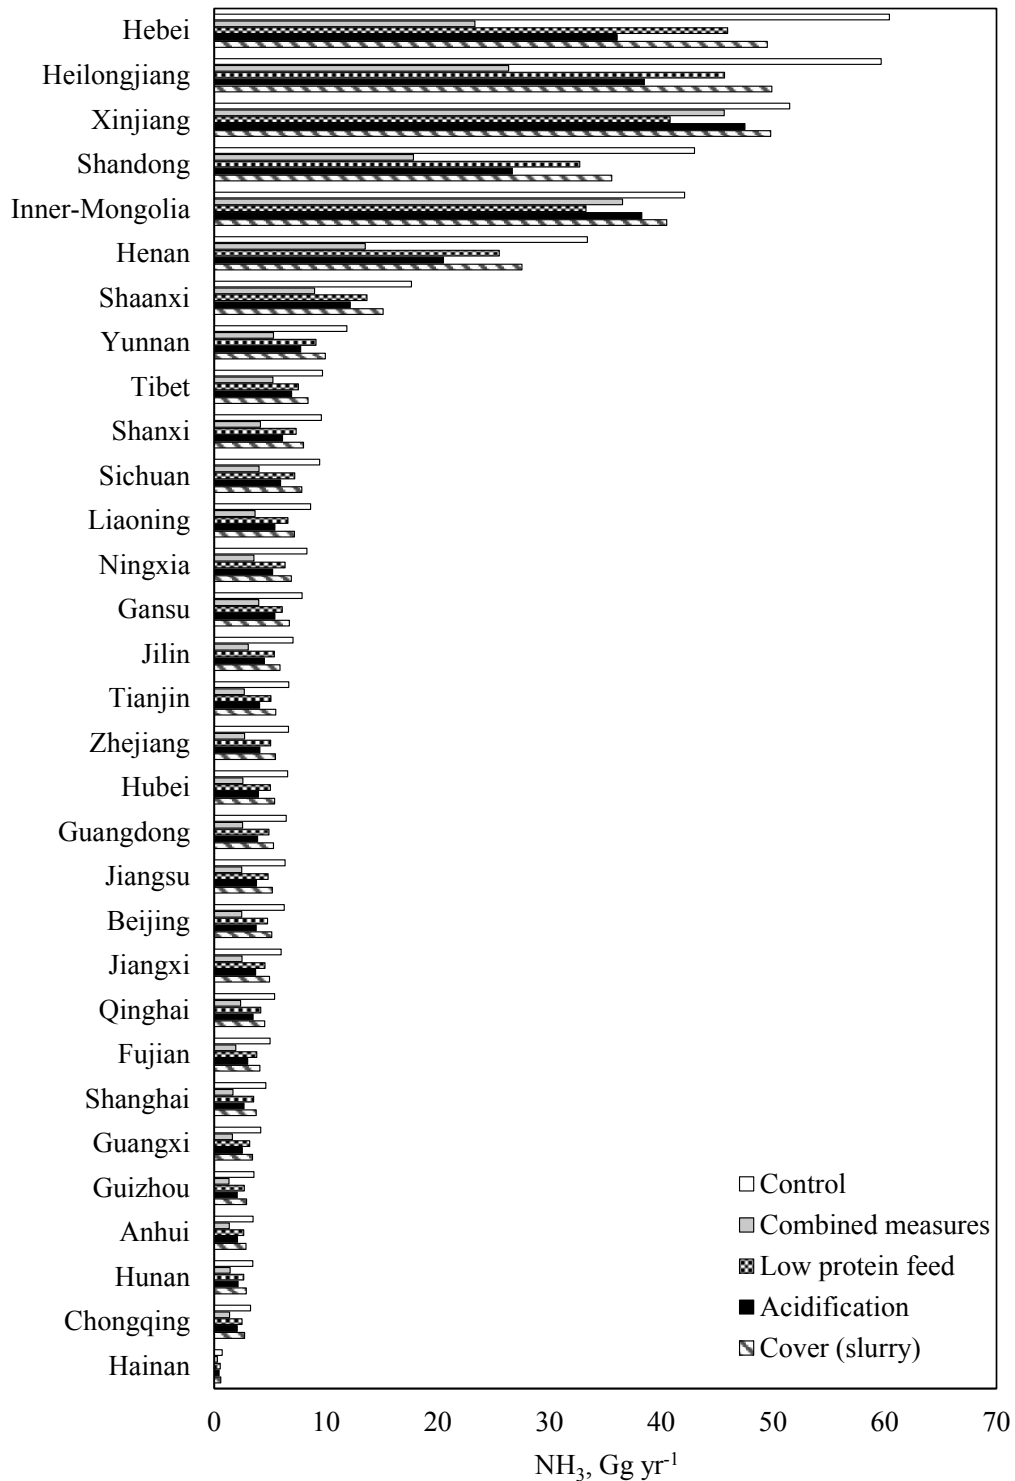

236

237

238

239

**Figure S3.** Ammonia emission without and with four selected abatement scenarios from dairy production system in different regions of China in 2015. The respective scenarios are described in Section 2.2 in the main text.

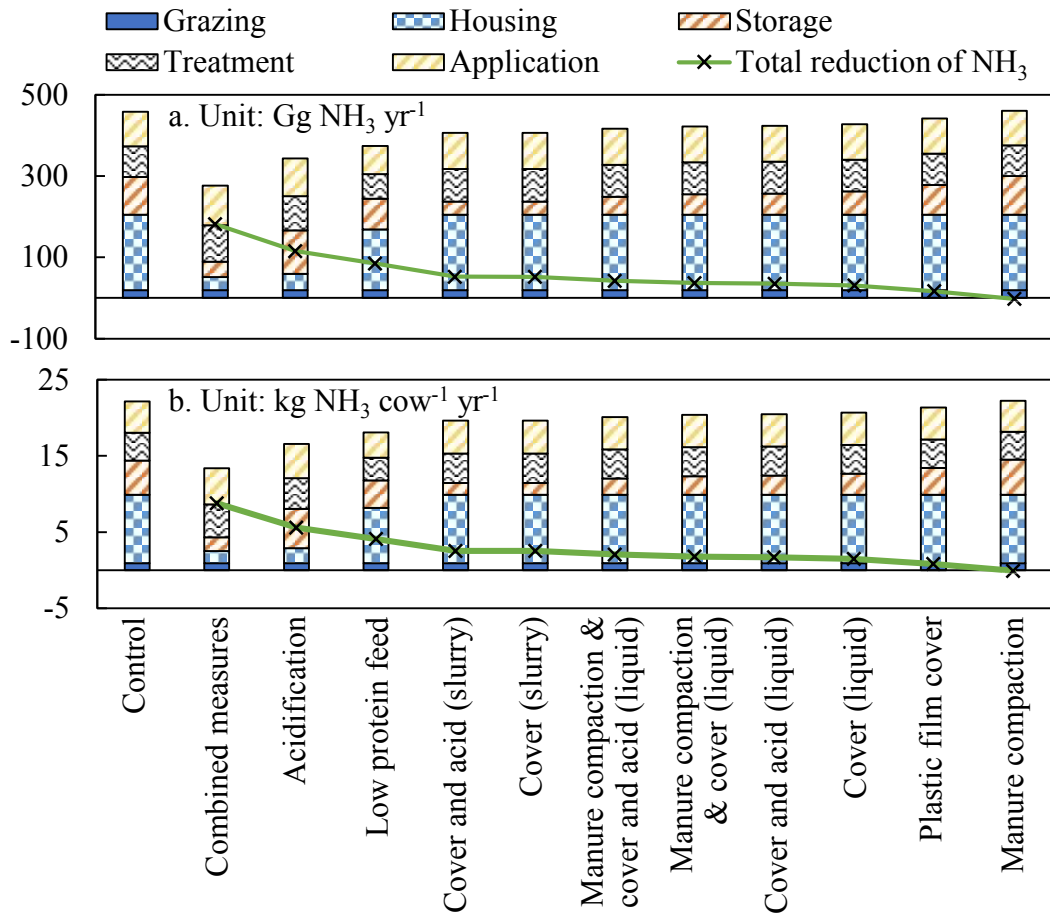

240

241

242

243

244

245

**Figure S4.** Total annual ammonia emission and reduction (a) and ammonia emission and reduction on an animal basis (b) from abatement options for dairy production in China in 2015, based on 80% of reduction efficiency achieved. Bars are ammonia emissions from different manure management stages, and green lines are total reduction of ammonia. The respective scenarios are described in Section 2.2 in the main text.

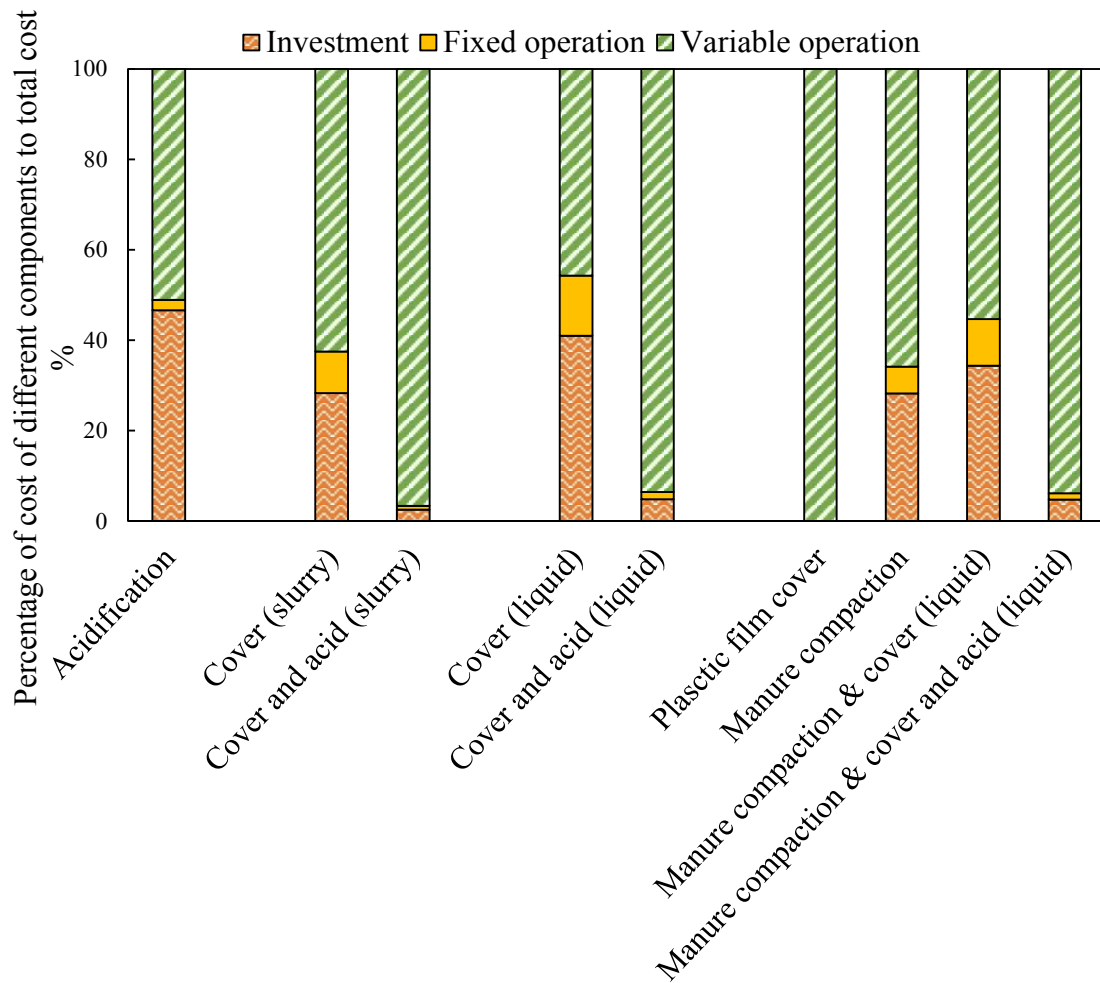

246  
 247  
 248  
 249

**Figure S5.** Cost structure for technical implementation of NH<sub>3</sub> emission abatement options. The respective scenarios are described in Section 2.2 in the main text.



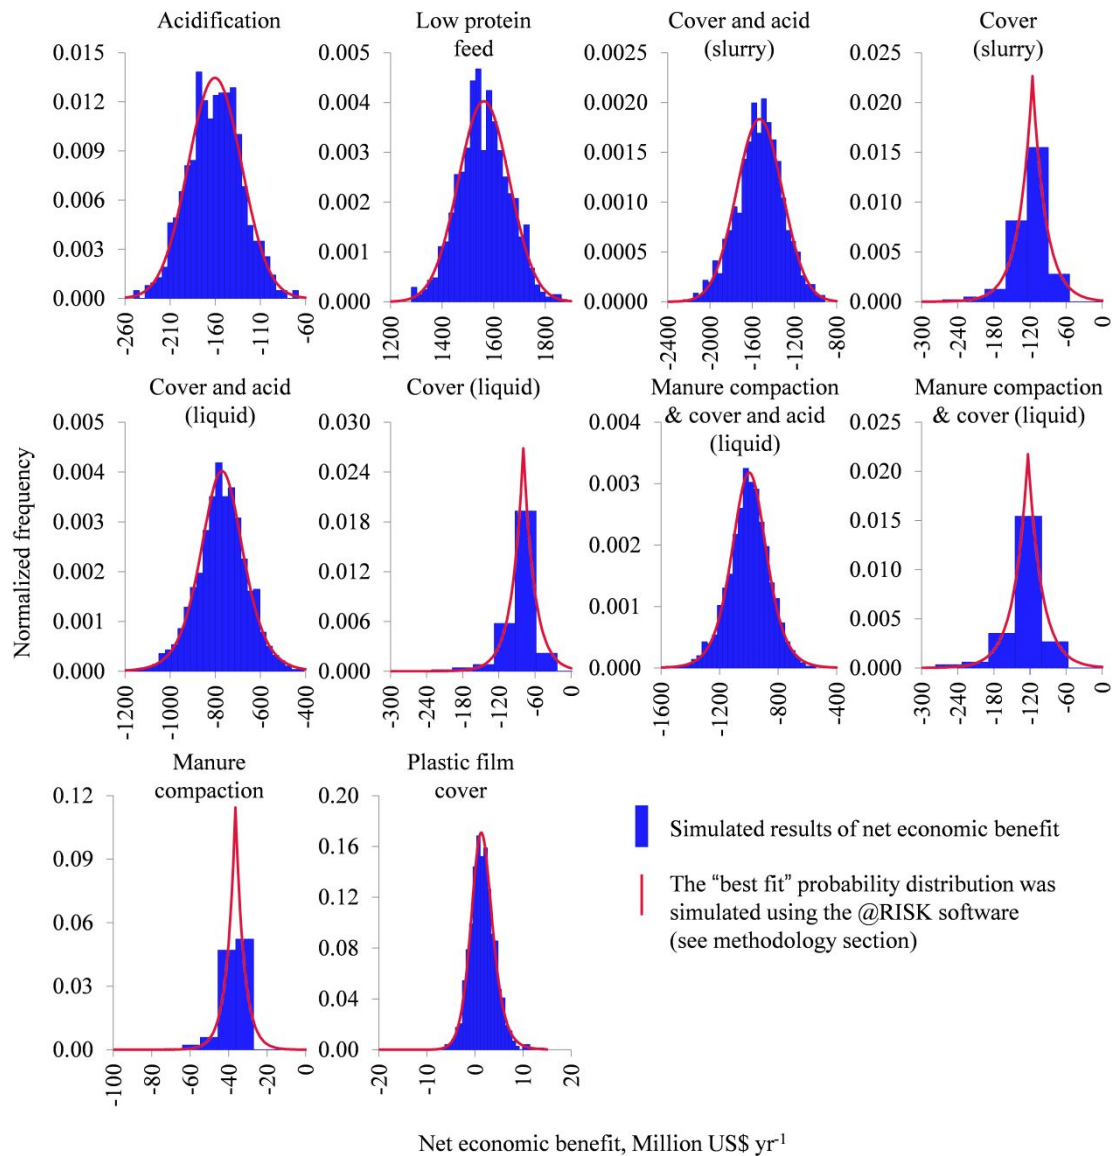

251

252 **Figure S6.** Uncertainty analysis of net economic benefit (without health damage cost  
 253 saving) for selected abatement options. The respective scenarios are described in  
 254 Section 2.2 in the main text.

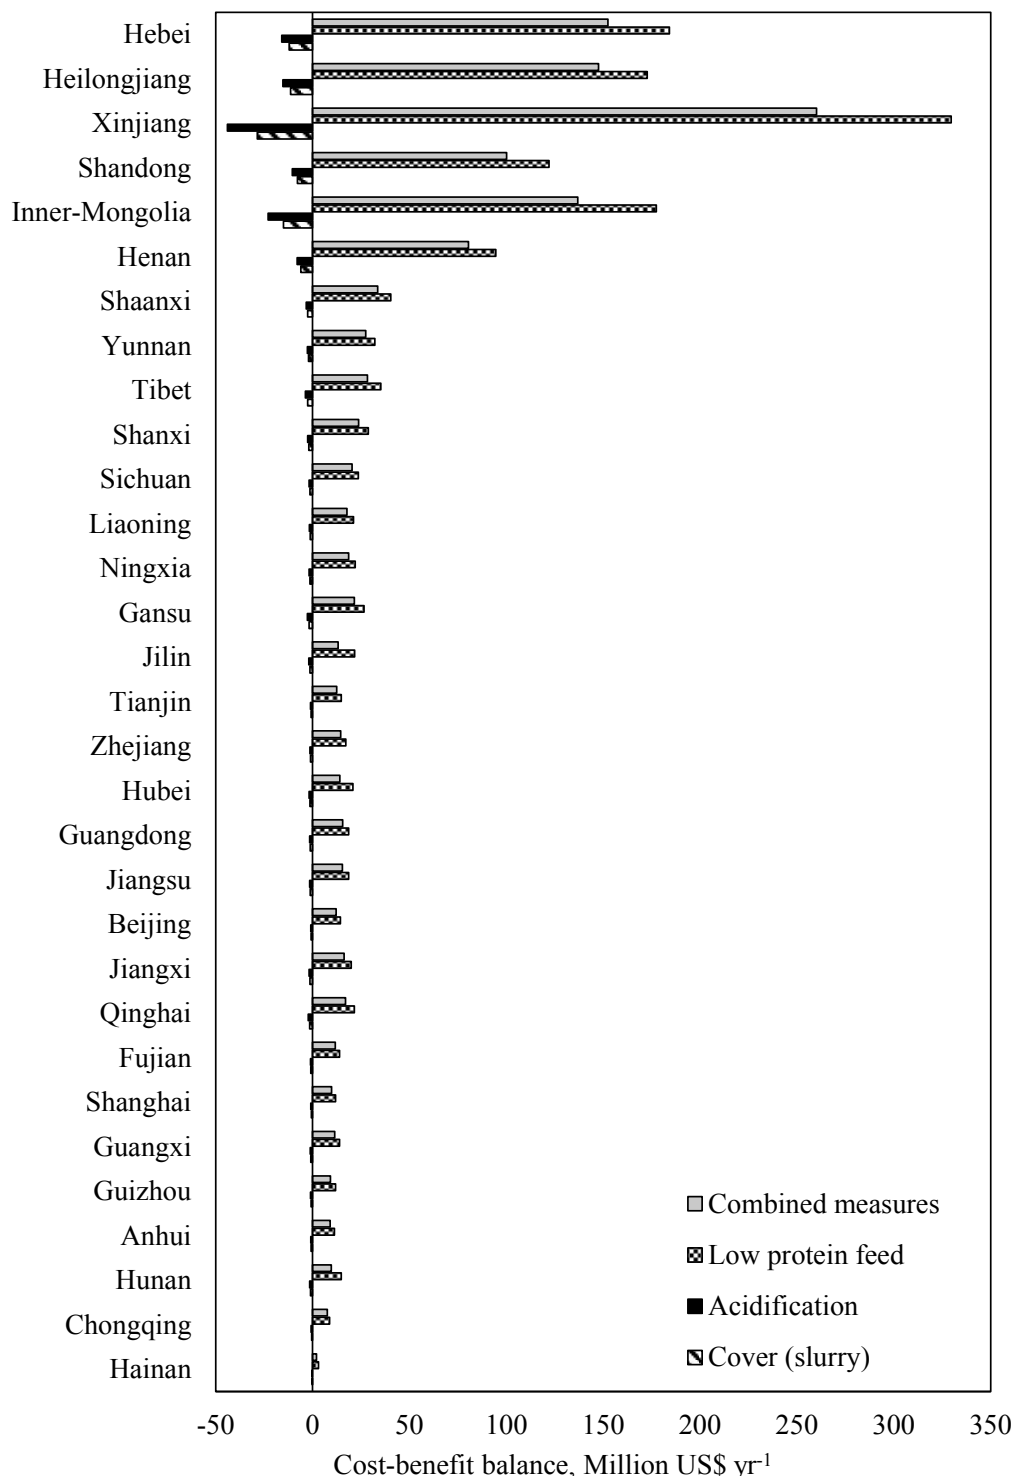

255  
 256 **Figure S7.** Cost-benefit balance (fertilizer saving minus technical implementation cost)  
 257 in different region for mitigation options applied to dairy production in 2015. A positive  
 258 value refers to net benefit from the balance, and a negative value refers to net cost. The  
 259 respective scenarios are described in Section 2.2 in the main text.

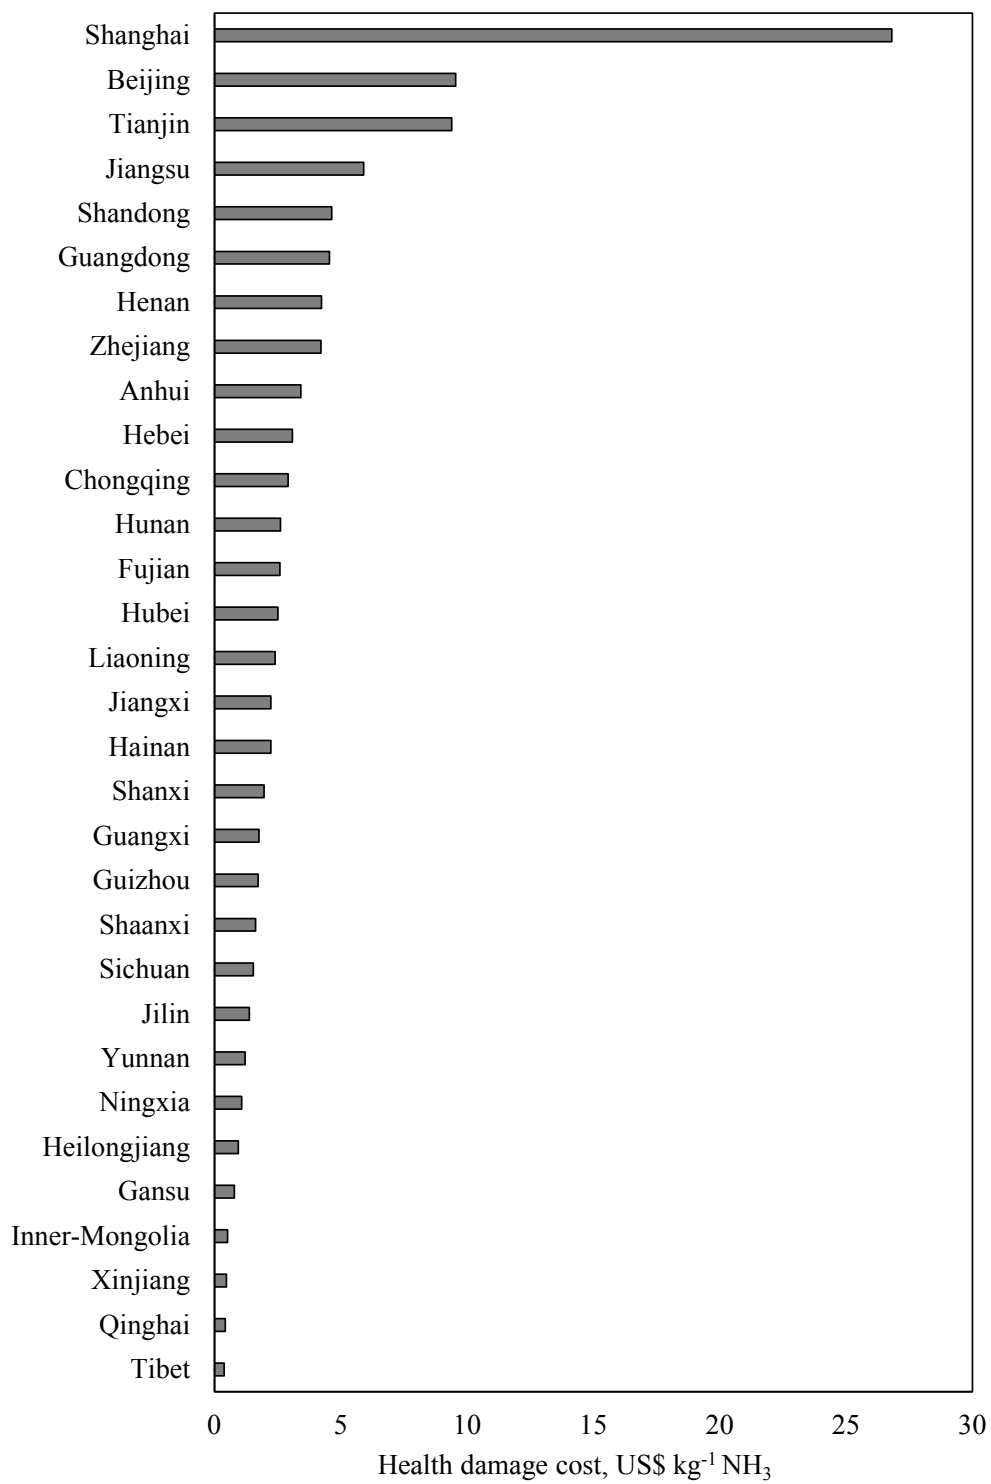

260

261

**Figure S8.** Regional variation of health damage cost based on 10% adjustment factor.

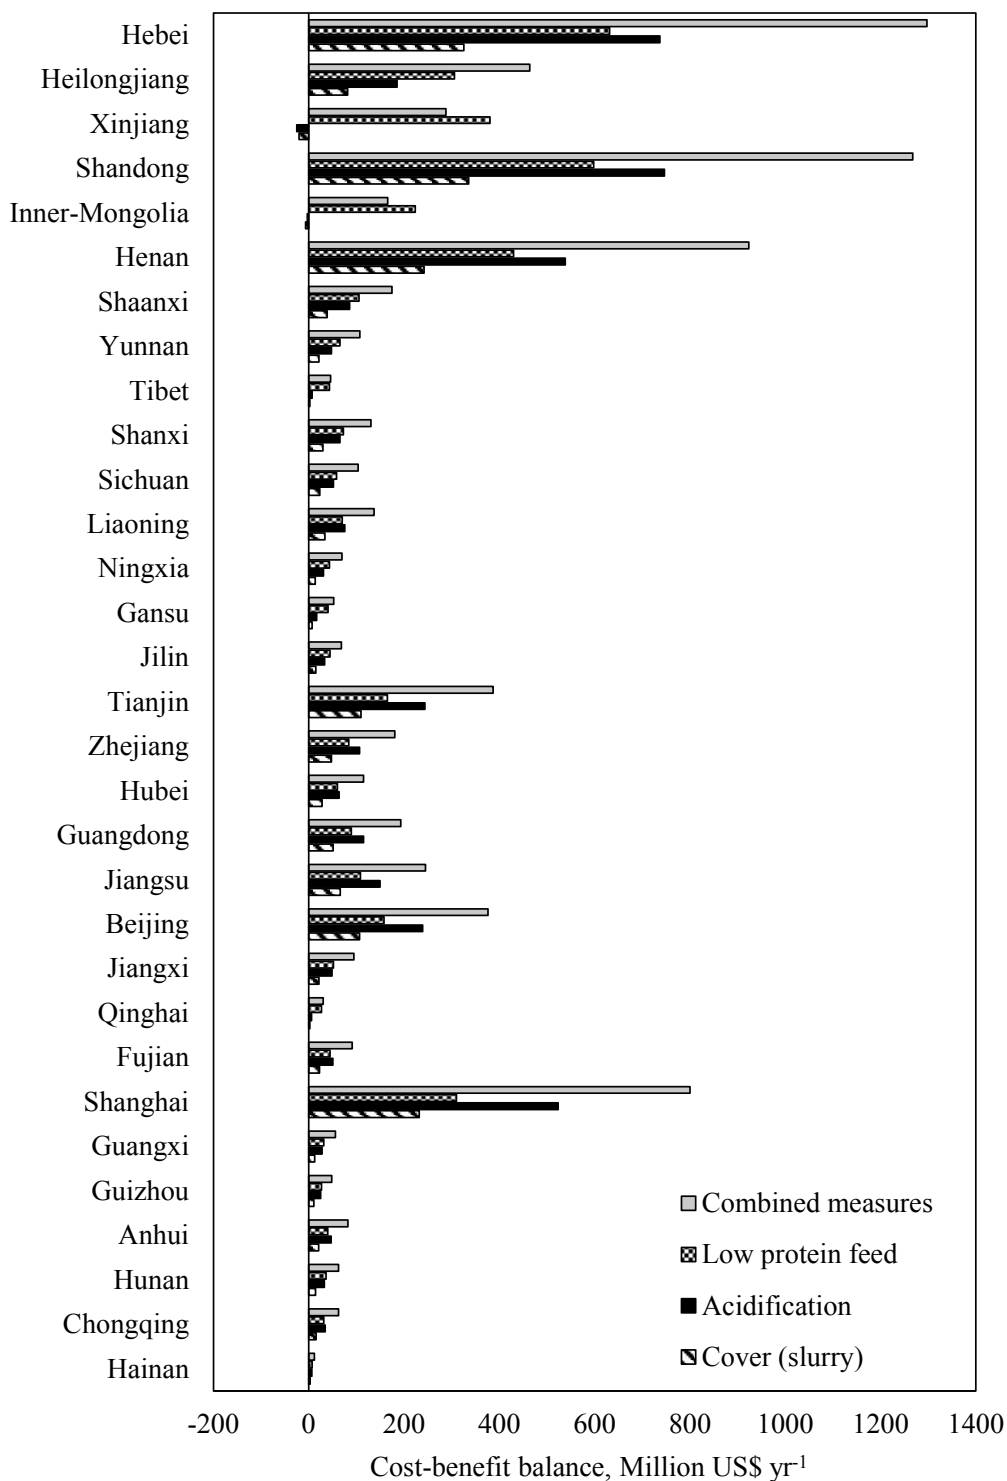

262  
263  
264  
265  
266  
267

**Figure S9.** Cost-benefit balance (sum of fertilizer saving and health damage cost saving with European dataset minus technical implementation cost) in different region for mitigation options applied to dairy production in 2015. A positive value refers to net benefit from the balance, and a negative value refers to net cost. The respective scenarios are described in Section 2.2 in the main text.

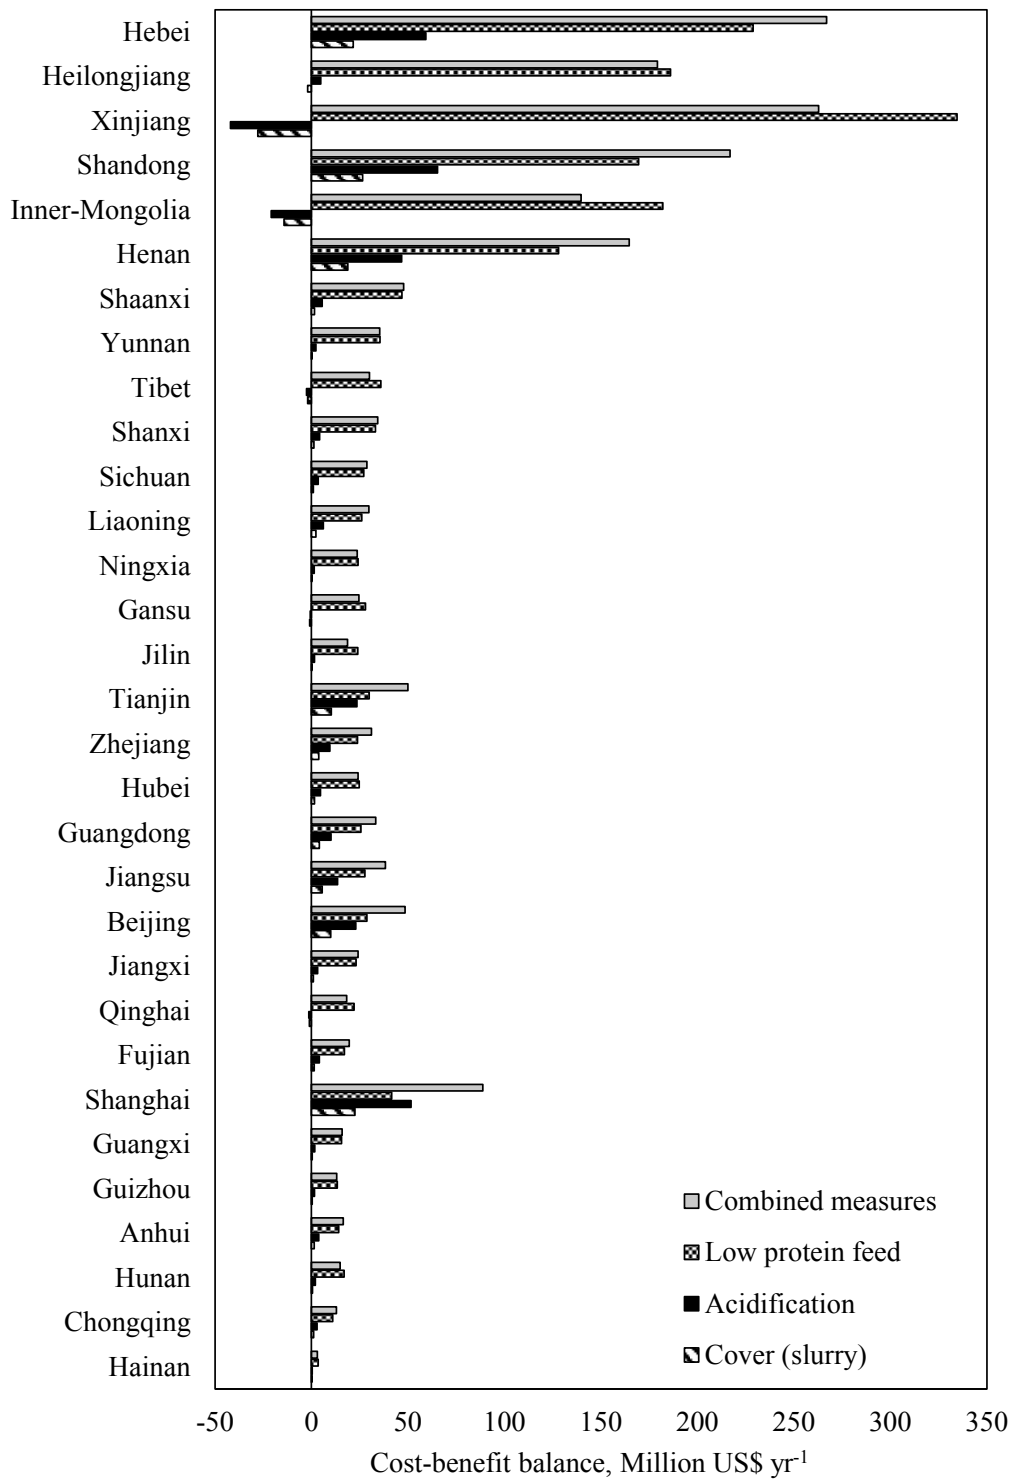

268  
 269 **Figure S10.** Cost-benefit balance (sum of fertilizer saving and health damage cost saving  
 270 with adjustment factor at 10% minus technical implementation cost) in million US\$ in  
 271 different region for mitigation options applied to dairy production in 2015. A positive  
 272 value refers to net benefit from the balance, and a negative value refers to net cost. The  
 273 respective scenarios are described in Section 2.2 in the main text.

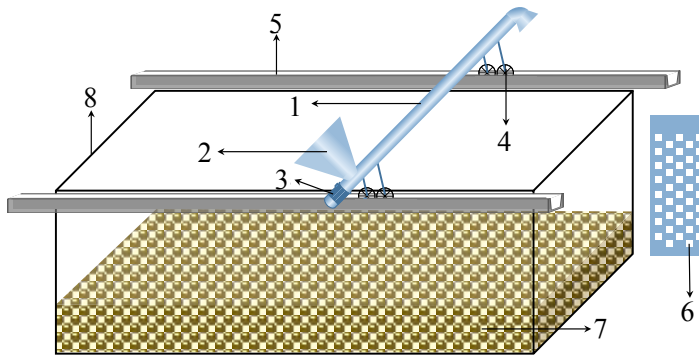

1.U-spiral conveyor; 2. hopper; 3. electric motor; 4. caster; 5. track; 6. mesh on the bottom of conveyor; 7. slurry or liquid manure; 8. storage facility.

274  
275

**Figure S11.** Diagram of coverage system during housing.

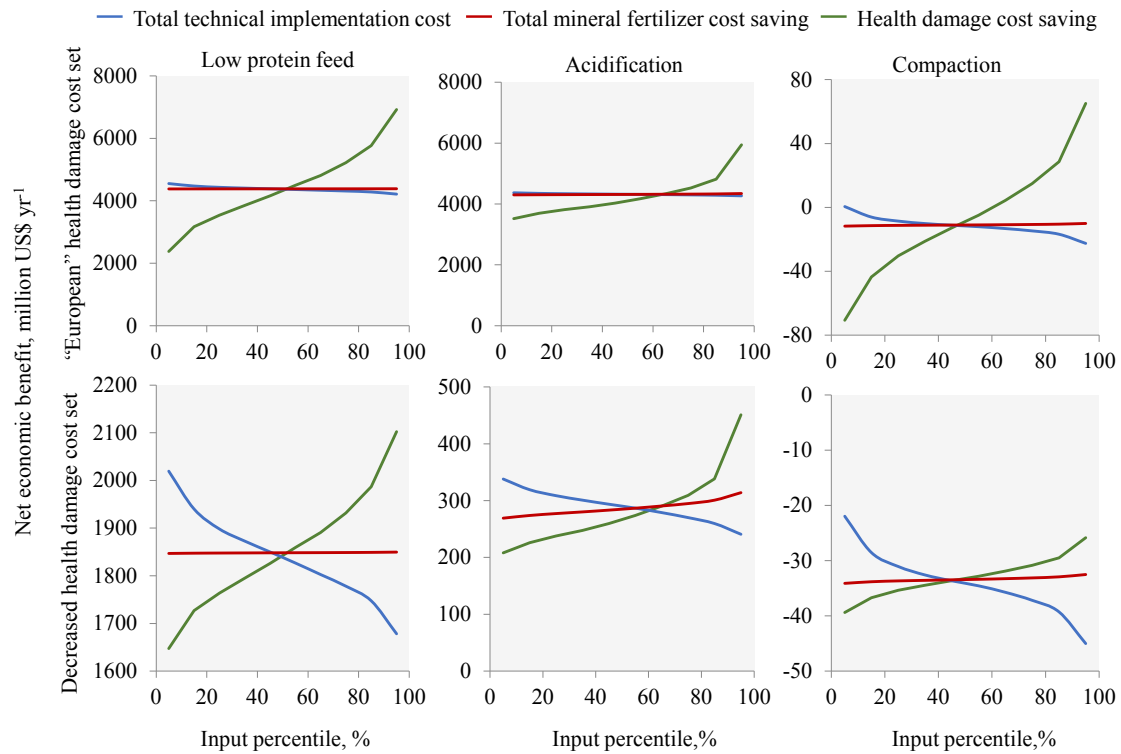

276

277

278

279

280

281

282

283

284

**Figure S12.** Sensitivity analysis of net economic benefit with health damage cost saving under selected abatement options. The respective scenarios are described in Section 2.2 in the main text. Costs for each respective abatement measure vary on X-axis. Y-axis shows how the value of net economic benefit changes as the sampled input value changes. The “European” health damage cost set applies the value of a life year derived by Brink et al.<sup>11</sup> Only 10% of this value is used in the decreased health damage cost set, as used by Gu et al.<sup>5, 12</sup>

285 **References**

- 286 1. Pereira, J.; Fangueiro, D.; Misselbrook, T. H.; Chadwick, D. R.; Coutinho, J.;  
287 Trindade, H. Ammonia and greenhouse gas emissions from slatted and solid floors  
288 in dairy cattle houses: A scale model study. *Biosyst Eng.* **2011**, 109, 148-157.
- 289 2. Wheeler, E. F.; Adviento-Borbe, M. A. A.; Topper, P. A.; Brown, N. E.; Varga, G.  
290 Ammonia and greenhouse gas emissions from dairy freestall barn manure. *American*  
291 *Society of Agricultural and Biological Engineers*. Rhode Island, June 29-July 2,  
292 **2008**, 1.
- 293 3. Lee, C.; Hristov, A.; Dell, C.; Feyereisen, G.; Kaye, J.; Beegle, D. Effect of dietary  
294 protein concentration on ammonia and greenhouse gas emitting potential of dairy  
295 manure. *J. Dairy Sci.* **2012**, 95, 1930–1941.
- 296 4. Chadwick, D. Emissions of ammonia, nitrous oxide and methane from cattle manure  
297 heaps: effect of compaction and covering. *Atmos Environ.* **2005**, 39(4), 787-799.
- 298 5. Gu, B., Ju, X., Chang, J., Ge, Y., Vitousek, P. M. Integrated reactive nitrogen  
299 budgets and future trends in China. *P. Natl. Acad. Sci. USA* **2015**, 112, 8792-8797.
- 300 6. Gu, B.; Ge, Y.; Chang, S. X.; Luo, W.; Chang, J. Nitrate in groundwater of China:  
301 Sources and driving forces. *Global Environ. Change* **2013**, 23, 1112-1121.
- 302 7. Oenema, J., Burgers, S., van Keulen, H., van Ittersum, M. Stochastic uncertainty  
303 and sensitivities of nitrogen flows on dairy farms in The Netherlands. *Agr. Syst.*  
304 **2015**, 137, 126-138.
- 305 8. Oenema, O., Kros, H., de Vries, W. Approaches and uncertainties in nutrient



- 306 budgets: implications for nutrient management and environmental policies. *Eur. J.*  
307 *Agron.* **2003**, 20, 3-16.
- 308 9. Flysjö, A., Henriksson, M., Cederberg, C., Ledgard, S., Englund, J. E. The impact of  
309 various parameters on the carbon footprint of milk production in New Zealand and  
310 Sweden. *Agr. Syst.* **2011**, 104, 459-469.
- 311 10. Basset-Mens, C., Kelliher, F. M., Stewart, L., Cox, N. Uncertainty of global  
312 warming potential for milk production on a New Zealand farm and implications for  
313 decision making. *Int. J. Life Cycle Ass.* **2009**, 14, 630-638.
- 314 11. Brink, C.; van Grinsven, H.; Jacobsen, B. H.; Klimont, Z. Costs and benefits of  
315 nitrogen in the environment. *In* The European Nitrogen Assessment ; Sutton, M. A.;  
316 Howard, C. M.; Erisman, J. W.; Billen, G.; Bleeker, A.; Grennfelt, P.; van Grinsven,  
317 H.; Grizzetti, B. Cambridge University Press: New York. **2011**.
- 318 12. Gu, B.; Ge, Y.; Ren, Y.; Xu, B.; Luo, W.; Jiang, H.; Gu, B.; Chang, J. Atmospheric  
319 Reactive Nitrogen in China: Sources, Recent Trends, and Damage Costs. *Environ.*  
320 *Sci. Technol.* **2012**, 46, 9420-9427.  
321
